# Supplementary material for: Effective and Simple NaOH-Modification Method to Remove Methyl Violet Dye via Ipomoea aquatica Roots
Source: Hindawi journal article supplement (doi:10.1155/2021/5932222), 2021-01-01
Supplement: f1 [file 5932222.f1.docx]

**Supplementary Materials**

**Effective and simple NaOH-modification method to remove Methyl violet dye via *Ipomoea aquatica* roots**

**Yie Chen Lu1, Muhammad Raziq Rahimi Kooh2*, Linda Biaw Leng Lim1*, Namal Priyantha3,4**

*1Chemical Sciences Programme, Faculty of Science, Universiti Brunei Darussalam, Jalan Tungku Link, Gadong, Brunei Darussalam, BE1410*

*2Centre for Advanced Material and Energy Sciences, Universiti Brunei Darussalam, Jalan Tungku Link, Gadong, Brunei Darussalam, BE1410*

*3Department of Chemistry, Faculty of Science, University of Peradeniya, Sri Lanka*

*4Postgraduate Institute of Science, University of Peradeniya, Peradeniya, Sri Lanka*

****Correspondence should be addressed to:***

Dr Muhammad Raziq Rahimi Kooh, Lecturer

*Centre for Advanced Material and Energy Sciences*

*Universiti Brunei Darussalam, Jalan Tungku Link, Gadong BE 1410*

*Brunei Darussalam*

Tel: + 673 8858876

Email: [raziq.kooh@ubd.edu.bn](mailto:raziq.kooh@ubd.edu.bn)

Dr Linda B. L. Lim, Associated Professor,

*Chemical Sciences Programme, Faculty of Science,*

*Universiti Brunei Darussalam, Jalan Tungku Link, Gadong BE 1410*

*Brunei Darussalam*

(Tel: +673 8748010; Email: *lindabl.lim@yahoo.com*)

**Table S1**. Different types of error functions used

| **Error functions** | **Abbreviation** | **Equations** |
| --- | --- | --- |
| Average relative error | ARE |  |
| Sum of square error | SSE |  |
| Sum of absolute error | EABS |  |
| Marquardt's percent standard deviation | MPSD |  |
| Non-linear chi-square test | *χ*2 |  |

*qe,meas*is the experimental value; *qe,calc*is the calculated value; *n* is the number of data points in the experiment and *p* is the number of parameters of the model.

**Table S2.** Various kinetics models used in this study

| **Non-Linearized equation** | **Linearized equation** | **Plot** | |
| --- | --- | --- | --- |
| Pseudo first order | log (qe − qt ) = log qe − K1 |  | |
| Where qt is adsorption capacity at time t (mmol g-1), qe is adsorption capacity at equilibrium (mmol g-1) and K1 is the pseudo first order rate constant(min-1) | | |
| Pseudo second order |  |  | |
| Where K2 (g mmol-1 min -1) is the pseudo second order rate constant | | |
| Elovich |  |  | |
| Where α is the initial velocity to dqt/dt = α with qt = 0 (mmol g-1 min-1) and β is the desorption constant (g mmol-1) | | |
| Weber-Morris intraparticle diffusion  qt = K3 t 1/2 + C | - | qt vs t1/2 | |
| Where K3 is the intraparticle diffusion rate constant (mmol g-1 min -1/2) and C is the intercept | | |

**Table S3.** Five adsorption isotherm models used in this study

| **Non-Linearized equation** | **Linearized equation** | **Plot** |
| --- | --- | --- |
| Langmuir |  |  |
| Where *Ce* and *qe* are the concentration and adsorption capacity at equilibrium (mmol g-1), respectively; *KL* is the Langmuir constant (L mmol-1) and Q*max* is the maximum adsorption capacity (mmol g-1) | | |
| Freundlich |  |  |
| *KF* (mmol g1-1/n L1/n g-1) is the Freundlich constant indicative of adsorption capacity; *n* is related to the adsorption intensity | | |
| Temkin |  |  |
| Where *KT* (L mmol-1) is the Temkin constant; *bT* is related to the heat of adsorption (kJ mol-1) ; *R* is the gas constant while *T* is the absolute temperature at 298 K | | |
| Redlich-Peterson |  |  |
| Where *KR* (L mmol-1) and *aR* (mmol-1) are the R-P constants and *nR* is the empirical parameter related to the adsorption intensity | | |
| Sips |  |  |
| Where *KS* is the Sips constant (L mmol-1); *N* is the Sips exponent | | |
